# Supplementary material for: Intracellular Osteopontin Inhibits Toll-like Receptor Signaling and Impedes Liver Carcinogenesis
Source: Oxford University Press journal article supplement (doi:10.1158/0008-5472.can-14-0615), 2014-11-15
Supplement: 00085472can140615-sup-127623_3_supp_0_nhmpzh.doc [file 00085472can140615-sup-127623_3_supp_0_nhmpzh.doc]

**Supplementary Tables**

**Table S1:** **Real-Time PCR Primer Sequences.**

| **Gene Name** | **Sense** | **Antisense** |
| --- | --- | --- |
| cyclinD1 | GCTACCGCACAACGCACTTTC | GCCTTGGGGTCGACGTTCTG |
| c-Myc | ACTTATTGAGGAAACGACGAGAAC | CATTTTAATTCCAGCGCATCAG |
| IL-6 | GCTACCAAACTGGATATAATCAGGA | CCAGGTAGCTATGGTACTCCAGAA |
| TNF-α | ACTCAAATGGGCTTTCCGAAT | CACAGGGAAGAATCTGGAAAGG |
| IL-1 | GAAATGCCACCTTTTGACAGTG | TGGATGCTCTCATCAGGACAG |
| OPN | CTCACCATTCGGATGAGTCT | CTGTGGCATCAGGATACTGT |
| Actin | TGTTACCAACTGGGACGACA | CTGGGTCATCTTTTCACGGT |

**Table S2: Antibodies and Recombinant Protein Used in Western Blotting.**

| **Protein** | **Antibody** | | |
| --- | --- | --- | --- |
| OPN mAb | | sc-21742, Santa Cruz Biotechnology, Santa Cruz, CA, USA  23C3，generated in our laboratory，details in notes |  |
| STAT3 mAb | | 4904, Cell Signaling Technology, Danvers, MA, USA |  |
| phospho-STAT3 mAb | | 9145, Cell Signaling Technology |  |
| Erk pAb | | 9102, Cell Signaling Technology |  |
| phospho-Erk pAb | | 9101, Cell Signaling Technology |  |
| Akt pAb | | 9272, Cell Signaling Technology |  |
| phospho-Akt mAb | | 4058, Cell Signaling Technology |  |
| P38 mAb | | 2371, Cell Signaling Technology |  |
| phospho-P38 mAb | | 4631, Cell Signaling Technology |  |
| JNK pAb | | 9252, Cell Signaling Technology |  |
| phospho-JNK pAb | | 9251, Cell Signaling Technology |  |
| phospho-P65 mAb | | 3033, Cell Signaling Technology |  |
| MyD88 mAb | | 4283, Cell Signaling Technology |  |
| GAPDH mAb | | KC5G5, KangChen Bio-tech, P.R.China |  |
| IRAK1 mAb | | 4504, Cell Signaling Technology |  |
| Recombinant OPN protein | | generated in our laboratory，details in notes |  |

**Notes**

1. mAb: monoclonal antibody. pAb: polyclonal antibody.

2. Secondary antibodies used in Western blotting analysis, goat anti-rabbit IgG-HRP (sc-2030) and goat anti-mouse IgG-HRP (sc-2031), were purchased from Santa Cruz Biotechnology, CA, USA.

3. Mouse monoclonal antibody 23C3 and recombinant mouse OPN against human OPN were generated in our laboratory. Recombinant mouse OPN was expressed in yeast vector pPICZa and purified for use. Mouse mAb 23C3 showed crossreactivity with mouse OPN (1).

1. Fan K, Dai J, Wang H, Wei H, Cao Z, Hou S, et al. Treatment of collagen-induced arthritis with an anti-osteopontin monoclonal antibody through promotion of apoptosis of both murine and human activated T cells. Arthritis and rheumatism 2008;58:2041-52.
