# Supplementary material for: Intracellular Osteopontin Inhibits Toll-like Receptor Signaling and Impedes Liver Carcinogenesis
Source: Oxford University Press journal article supplement (doi:10.1158/0008-5472.can-14-0615), 2014-11-15
Supplement: 00085472can140615-sup-127623_3_supp_2704398_ndj050.doc [file 00085472can140615-sup-127623_3_supp_2704398_ndj050.doc]

**Supplementary Figure Legends:**

**Figure S1** Effects of host-derived OPN on inflammatory microenvironment in DEN-induced hepatocarcinogenesis.

(A) At 48 hours post-transfection, Hepa1-6 cells transfected with siControl or si*Opn* and mock-treated cells were extracted for detecting mRNA (left) and protein (right) expression of OPN. (B) WT and *Opn-/-* mice were injected intraperitoneally (*i.p.*) with 50 mg/kg of DEN for 24 hours. Aliquots of 5 × 106 Hepa1-6-siControl or Hepa1-6-si*Opn*-911 cells were then injected subcutaneously into each WT or *Opn-/-* mouse. All mice were sacrificed 14 days post inoculation. Gross appearance (upper) and tumor weight/ tumor volume were monitored (lower). Data represented the means ± SD **P*< 0.05. (C) Tumor tissues from (B) were lysed and then detected protein expression of OPN. GAPDH was used as an internal control. (D&E) F4/80 staining in sections of tumor tissues from (B), the expression of F4/80 was detected by rat anti-mouse F4/80 monoclonal antibody and horseradish peroxidase-labeled anti-rat IgG as primary and secondary antibody, respectively. Frequency of F4/80-positive cells was used to assess infiltration of macrophages. Scale bars=100μm. Data represented the means ± SD.

**Figure S2** Analysis of activation of MAPKs in macrophages treated with cellular debris.

Macrophages from WT or *Opn-/-* mice were administered with cellular debris (NEC) for the indicated times. Cells were lysed to assess activation of phosphoproteins by Western blotting, including p-ERK, total ERK, p-p38, total p38, p-JNK, total JNK.

**Figure S3** The effects of extracellular OPN on cytokine production in macrophages. Macrophages from WT or *Opn-/-* mice were administered with anti-OPN antibody or recombinant OPN protein, respectively, when stimulated with cellular debris. Cells were lysed for detecting expression of IL-6 or TNF-α by realtime-PCR. Data represented the means ± SD.
