# Supplementary material for: Intracellular Osteopontin Inhibits Toll-like Receptor Signaling and Impedes Liver Carcinogenesis
Source: Oxford University Press journal article supplement (doi:10.1158/0008-5472.can-14-0615), 2014-11-15
Supplement: 00085472can140615-sup-127623_3_supp_2704399_ndj04r.doc [file 00085472can140615-sup-127623_3_supp_2704399_ndj04r.doc]

**Supplementary Data**

**Materials and Methods**

**Immunohistochemical staining**

PCNA and F4/80-positive cells [weree assessed by](http://en.wikipedia.org/wiki/Proliferating_cell_nuclear_antigen) PCNA monoclonal antibody and F4/80 monoclonal antibody (Santa Cruz), respectively. The slides from the samples were dewaxed, hydrated and washed, and the endogenous peroxidase activity was quenched. After microwave antigen retrieval, slides were blocked and then incubated with the antibody against PCNA (1:50) and F4/80 (1:100) overnight at 4°C. Subsequently, sections were rinsed and incubated with the working solution of a horseradish peroxidase-labeled secondary antibody (Santa Cruz;1:200 or Beyotime; 1:100) for 60 minutes at 37°C. After rinsing for 3 times, staining was visualized using the peroxide substrate solution DAB (Dako). Counterstained by hematoxylin (Beyotime), the slides were dehydrated in graded alcohol and mounted. For antibody control, one set of samples was incubated with nonimmune IgG (Cell Signaling;1:200) instead of primary antibody.

**Tumor xenograft mouse model**

SiRNAs specific to OPN and control siRNA were purchased from Shanghai GeneChem Co. Ltd (Shanghai, P.R.China). Briefly, the sequences are provided as follows:

for si*Opn*-911, sense: 5’-GAUGAUAGGUAUCUGAAAUTT-3’ and antisense: 5’ -AUUUCAGAUACCUAUCAUCTT-3’;

for si*Opn*-286, sense: 5’ -GGAUGACUUUAAGCAAGAATT-3’ and antisense:5’ -UUCUUGCUUAAAGUCAUCCTT-3’.

Hepa1-6 cells were transfected with si*Opn*-911 by using DharmaFect (Thermo Fisher Scientific), according to the manufacturer’s instructions. After 48hr, the cells were trypsinized and washed, and then 5 × 106 cells were suspended in 100 µL of Dulbecco’s modified Eagle medium and Matrigel (1:1) (BD) and injected subcutaneously into each mouse (n = 8 mice per group), which was injected *i.p.* with 50mg/kg DEN 24 hr before inoculation. All mice were sacrificed 14 days post inoculation and tumor size was monitored. Tumor volume was calculated using the following formula: larger diameter ×(smaller diameter)2/2. Every tumor tissue was separated into two parts. One was lysed by RIPA lysis buffer for detection of protein expression, and the other one was fixed by formalin for immunohistochemical staining.

**Western blotting and Quantitative Real-Time PCR**

Western blotting and Quantitative Real-Time PCR were performed as protocol described in Material and Methods in the text. The antibodies and the primer sequences used are listed in the Supplementary Data (Table S2).
